# Supplementary material
Source: HighWire-hosted journal article supplement (https://openres.ersjournals.com/content/7/3/00020-2021)
Supplement: inline-supplementary-material-1 [file inline-supplementary-material-1.pdf]

## ONLINE SUPPLEMENT

### LUNG FUNCTION TRAJECTORY AND BIOMARKERS

#### IN THE TASMANIAN LONGITUDINAL HEALTH STUDY

Dinh S Bui<sup>1\*</sup>, Alvar Agusti<sup>2,3,4,5\*</sup>, Haydn Walters<sup>1</sup>, Caroline Lodge<sup>1</sup>, Jennifer L Perret<sup>1,6</sup>,  
Adrian Lowe<sup>1</sup>, Gayan Bowatte<sup>1</sup>, Raisa Cassim<sup>1</sup>, Garun S Hamilton<sup>7,8</sup>, Peter Frith<sup>9</sup>, Alan  
James<sup>10</sup>, Paul S Thomas<sup>11</sup>, Debbie Jarvis<sup>12</sup>, Michael J Abramson<sup>13</sup>, Rosa Faner<sup>2,3+</sup>, Shyamali  
C Dharmage<sup>1+</sup>

#### **Lung function tests**

Pre- and post-BD spirometry were performed according to international standards (1).  
Spirometry z-scores were derived from the Global Lung Initiative (GLI) reference equations  
(2).

Table S1. Biomarker values (median [IQR]) in C, AD and ND participants (C included both smokers and non-smokers).

|             | Controls (C)<br>(N=1398) |               | Accelerated decline (AD)<br>(N=60) |                 | Normal decline (ND)<br>(N=94) |               | P-value          |              |              |
|-------------|--------------------------|---------------|------------------------------------|-----------------|-------------------------------|---------------|------------------|--------------|--------------|
|             | n                        | Median [IQR]  | n                                  | Median [IQR]    | n                             | Median [IQR]  | C vs. AD         | C vs. ND     | AD vs. ND    |
| <b>CRP</b>  |                          |               |                                    |                 |                               |               |                  |              |              |
| 45 years    | 437                      | 2.4 [1.1-5.1] | 37                                 | 3.2 [1.6-8.6]   | 45                            | 2.6 [1.8-6.0] | <b>0.05</b>      | 0.23         | 0.36         |
| 53 years    | 1286                     | 2.3 [1.1-4.8] | 55                                 | 5.1 [1.9, 10.2] | 84                            | 2.6 [1.3-5.9] | <b>&lt;0.001</b> | 0.27         | <b>0.01</b>  |
| <b>CC16</b> |                          |               |                                    |                 |                               |               |                  |              |              |
| 45 years    | 413                      | 6.8 [4.9-8.9] | 33                                 | 3.9 [2.3-5.9]   | 43                            | 5.6 [4.2-7.6] | <b>&lt;0.001</b> | <b>0.02</b>  | <b>0.003</b> |
| 53 years    | 410                      | 7.5 [5.3-9.7] | 34                                 | 3.9 [2.6-5.5]   | 42                            | 5.4 [3.7-8.6] | <b>&lt;0.001</b> | <b>0.002</b> | <b>0.005</b> |

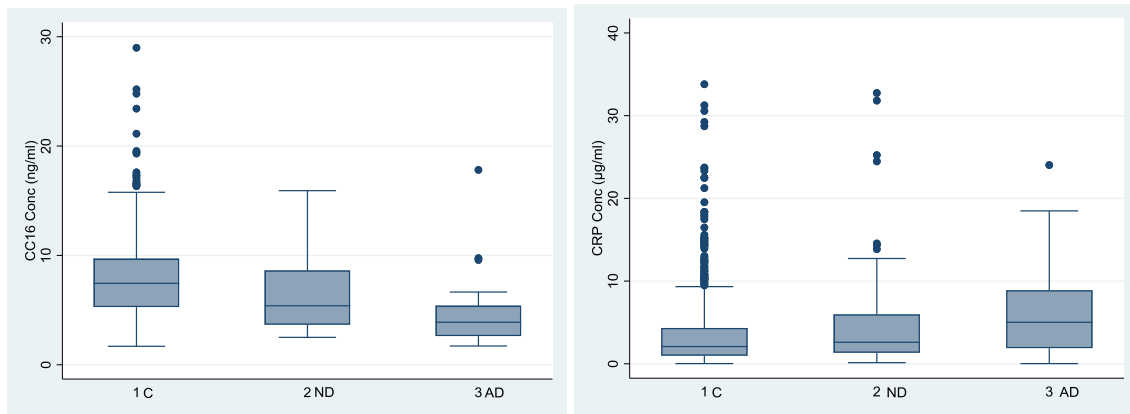

**Figure S1.** CC16 and CRP levels at 53 years across three groups. AD=accelerated decline. ND=Early low-normal decline; C=controls

## Reference

1. Miller MR, Hankinson J, Brusasco V, et al. Standardisation of spirometry. *Eur Respir J* 2005; 26: 319-38.
2. Quanjer PH, Stanojevic S, Cole TJ, et al. Multi-ethnic reference values for spirometry for the 3–95-yr age range: the global lung function 2012 equations. *Eur Respir J* 2012; 40: 1324-43.
